# Supplementary material
Source: PubMed Central journal article supplement (PMC5241172)
Supplement: NIHMS833533-supplement-Suppl_Table_1.pdf [file NIHMS833533-supplement-Suppl_Table_1.pdf]

## **SUPPLEMENTAL MATERIAL**

**Supplemental Table 1.** Baseline characteristics of the MACE group.

|                                   | MACE Group<br>(N=2929) | Missing MACE Data group<br>(N=490) | P-Value |
|-----------------------------------|------------------------|------------------------------------|---------|
| Age, years (SD)                   | 44.0 (10.6)            | 42.7 (10.4)                        | 0.013   |
| Female, N (%)                     | 1684 (57.5)            | 234 (47.8)                         | <0.001  |
| BMI                               | 30.9 (7.6)             | 30.0 (7.8)                         | <0.001  |
| HTN, N (%)                        | 849 (32.1)             | 114 (35.7)                         | 0.11    |
| Diabetes, N (%)                   | 231 (10.6)             | 83 (16.9)                          | <0.001  |
| Current smoking, N (%)            | 813 (27.8)             | 191 (39.1)                         | <0.001  |
| <u>Laboratory variables</u>       |                        |                                    |         |
| Lp(a), nmol/L                     | 76.0 (75.3)            | 72.7 (81.1)                        | 0.38    |
| OxPL-apoB, RLU                    | 6337 (5523)            | 6434 (5553)                        | 0.72    |
| Size of major isoform, # kringles | 23.9 (5.4)             | 24.6 (5.5)                         | 0.007   |
| Total Cholesterol, mg/dl          | 181.3 (39.6)           | 174.3 (40.0)                       | <0.001  |
| LDL-C, mg/dl                      | 107.3 (35.4)           | 99.4 (35.2)                        | 0.029   |
| HDL-C, mg/dl                      | 50.1 (14.6)            | 49.1 (16.2)                        | 0.18    |
| VLDL-C, mg/dl                     | 23.8 (18.6)            | 25.9 (20.5)                        | 0.02    |
| Triglycerides, mg/dl              | 122.0 (39.6)           | 137.8 (40.0)                       | 0.003   |

Values are given as mean (SD)
